# Supplementary material
Source: ML conference proceedings conference paper supplement (https://proceedings.neurips.cc/paper_files/paper/2022/hash/57d7e7e1593ad1ab6818c258fa5654ce-Abstract.html)
Supplement: Supplementary file 1 [file 57d7e7e1593ad1ab6818c258fa5654ce-Supplemental-Conference.zip]

Archive with 4 entries (4 files):
- Code.zip
- __MACOSX/._Code.zip
- Paper+Supp.pdf
- __MACOSX/._Paper+Supp.pdf
